# Supplementary material for: Novel luminescent hybrids by incorporating rare earth β-diketonates into polymers through ion pairing with an imidazolium counter ion
Source: Royal Society of Chemistry journal article supplement (doi:10.1039/c3pp50066g), 2013-04-16
Supplement: c3pp50066g.pdf [file c3pp50066g.pdf]

## Supporting information

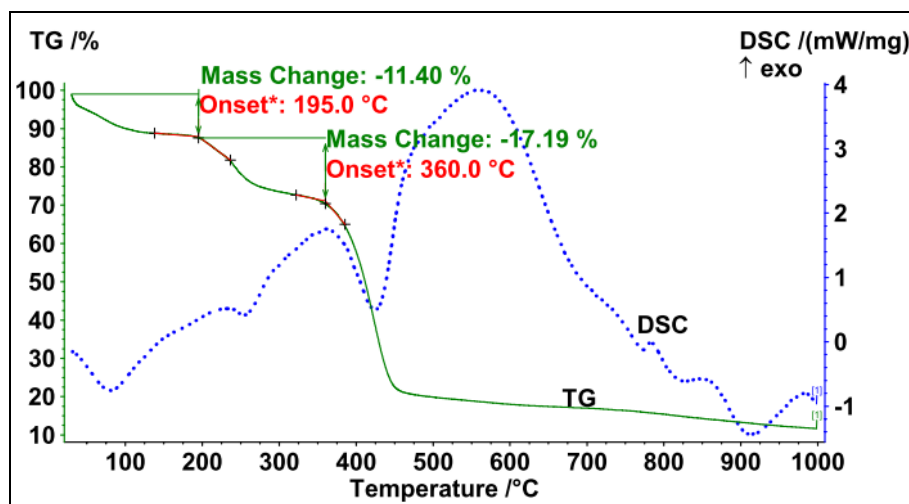

**Figure S1** TG and DSC curves of WR-IM<sup>+</sup>[Eu(TTA)<sub>4</sub>]<sup>-</sup>.

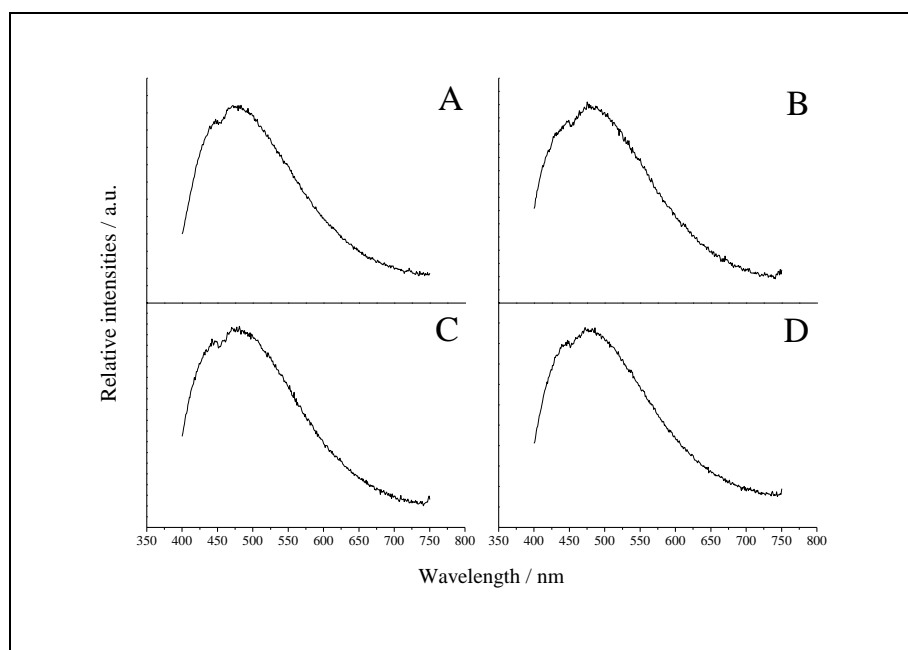

**Figure S2** Emission spectra of the Poly(St-HEMA) matrix (A), europium tetrakis(TAA) complexes treated Poly(St-HEMA) (B), samarium tetrakis(TAA) complexes treated Poly(St-HEMA) (C), and terbium tetrakis(TAA) complexes treated Poly(St-HEMA) (D). The excitation wavelength for the emission spectra are 365, 323, 315 and 325 nm for A, B, C and D, respectively. All the Poly(St-HEMA) used here are unmodified by the imidazolium.

As shown in Figure S2, the selected WR-IM<sup>+</sup>[Eu(TTA)<sub>4</sub>]<sup>-</sup> shows a two-step weight loss approach over 195 °C according to the DTG and the DSC curves. The weight loss between 195 and 360 °C could be associated with the decomposition of europium tetrakis(β-diketonate) attaching onto the polymer matrices.

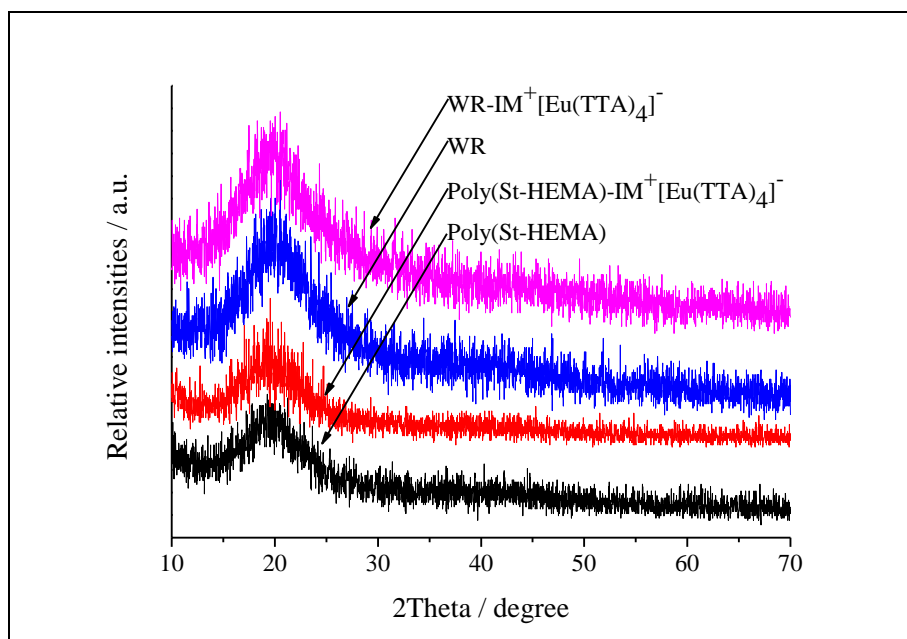

Figure S3 XRD patterns for the selected polymers.

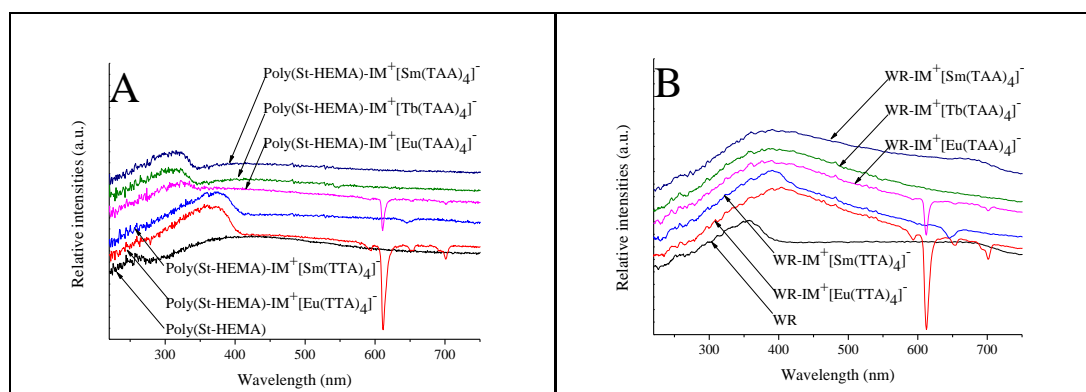

Figure S4 The diffuse reflectance UV-Vis spectra for Poly(St-HEMA)-based materials (A) and WR-based materials (B).

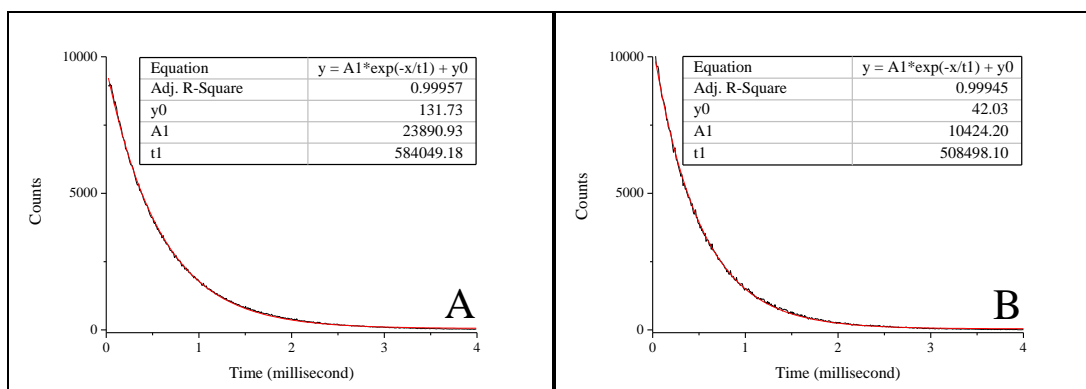

Figure S5 The luminescence lifetime decay curves of materials (A) WR-IM+[Eu(TTA)<sub>4</sub>]<sup>-</sup> and (B) poly(St-HEMA)-IM+[Tb(TTA)<sub>4</sub>]<sup>-</sup>. Curves fit to a single exponential.
